# Supplementary material
Source: PubMed Central journal article supplement (PMC4351554)

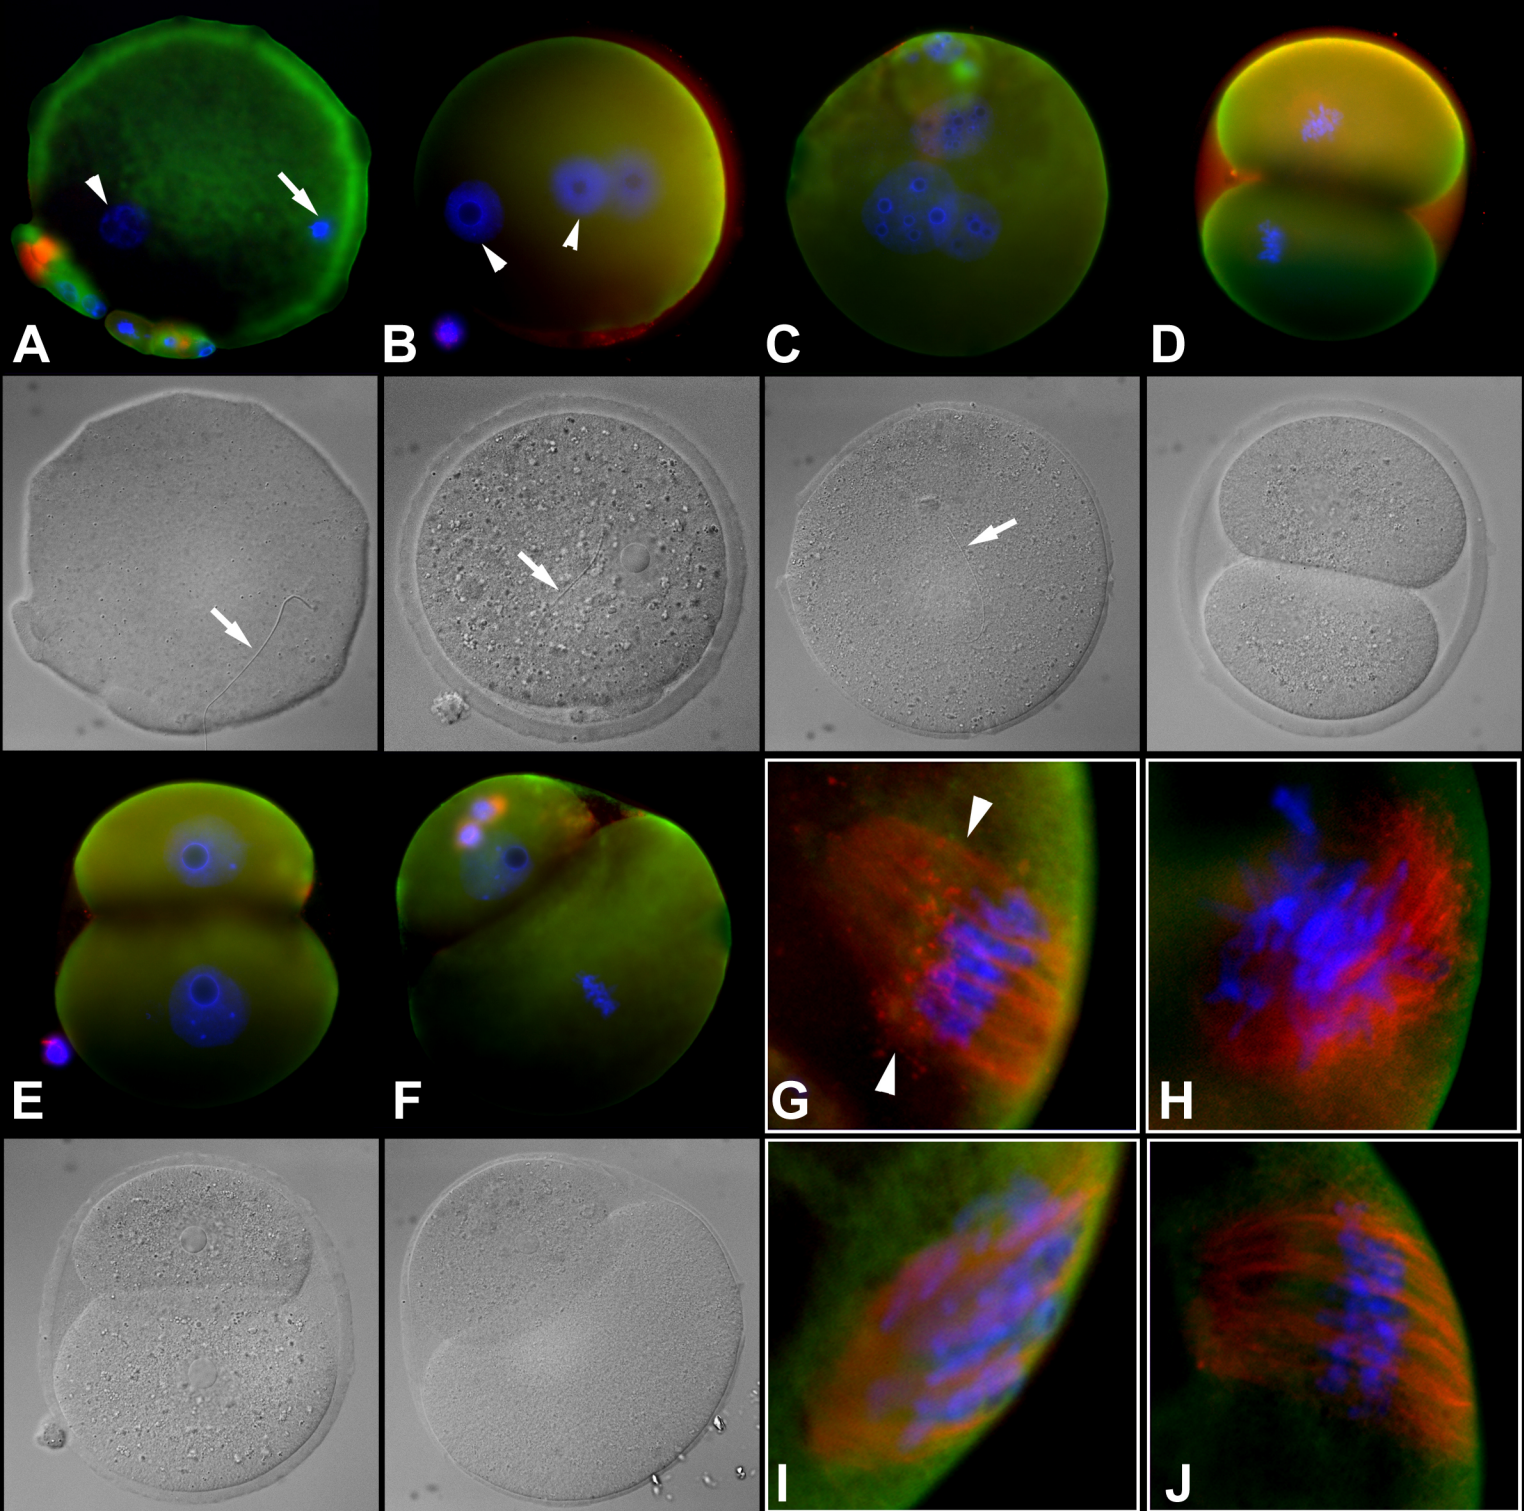

Supplement: NIHMS658605-supplement-Supplemental_Figure_1.pdf [file NIHMS658605-supplement-Supplemental_Figure_1.pdf]

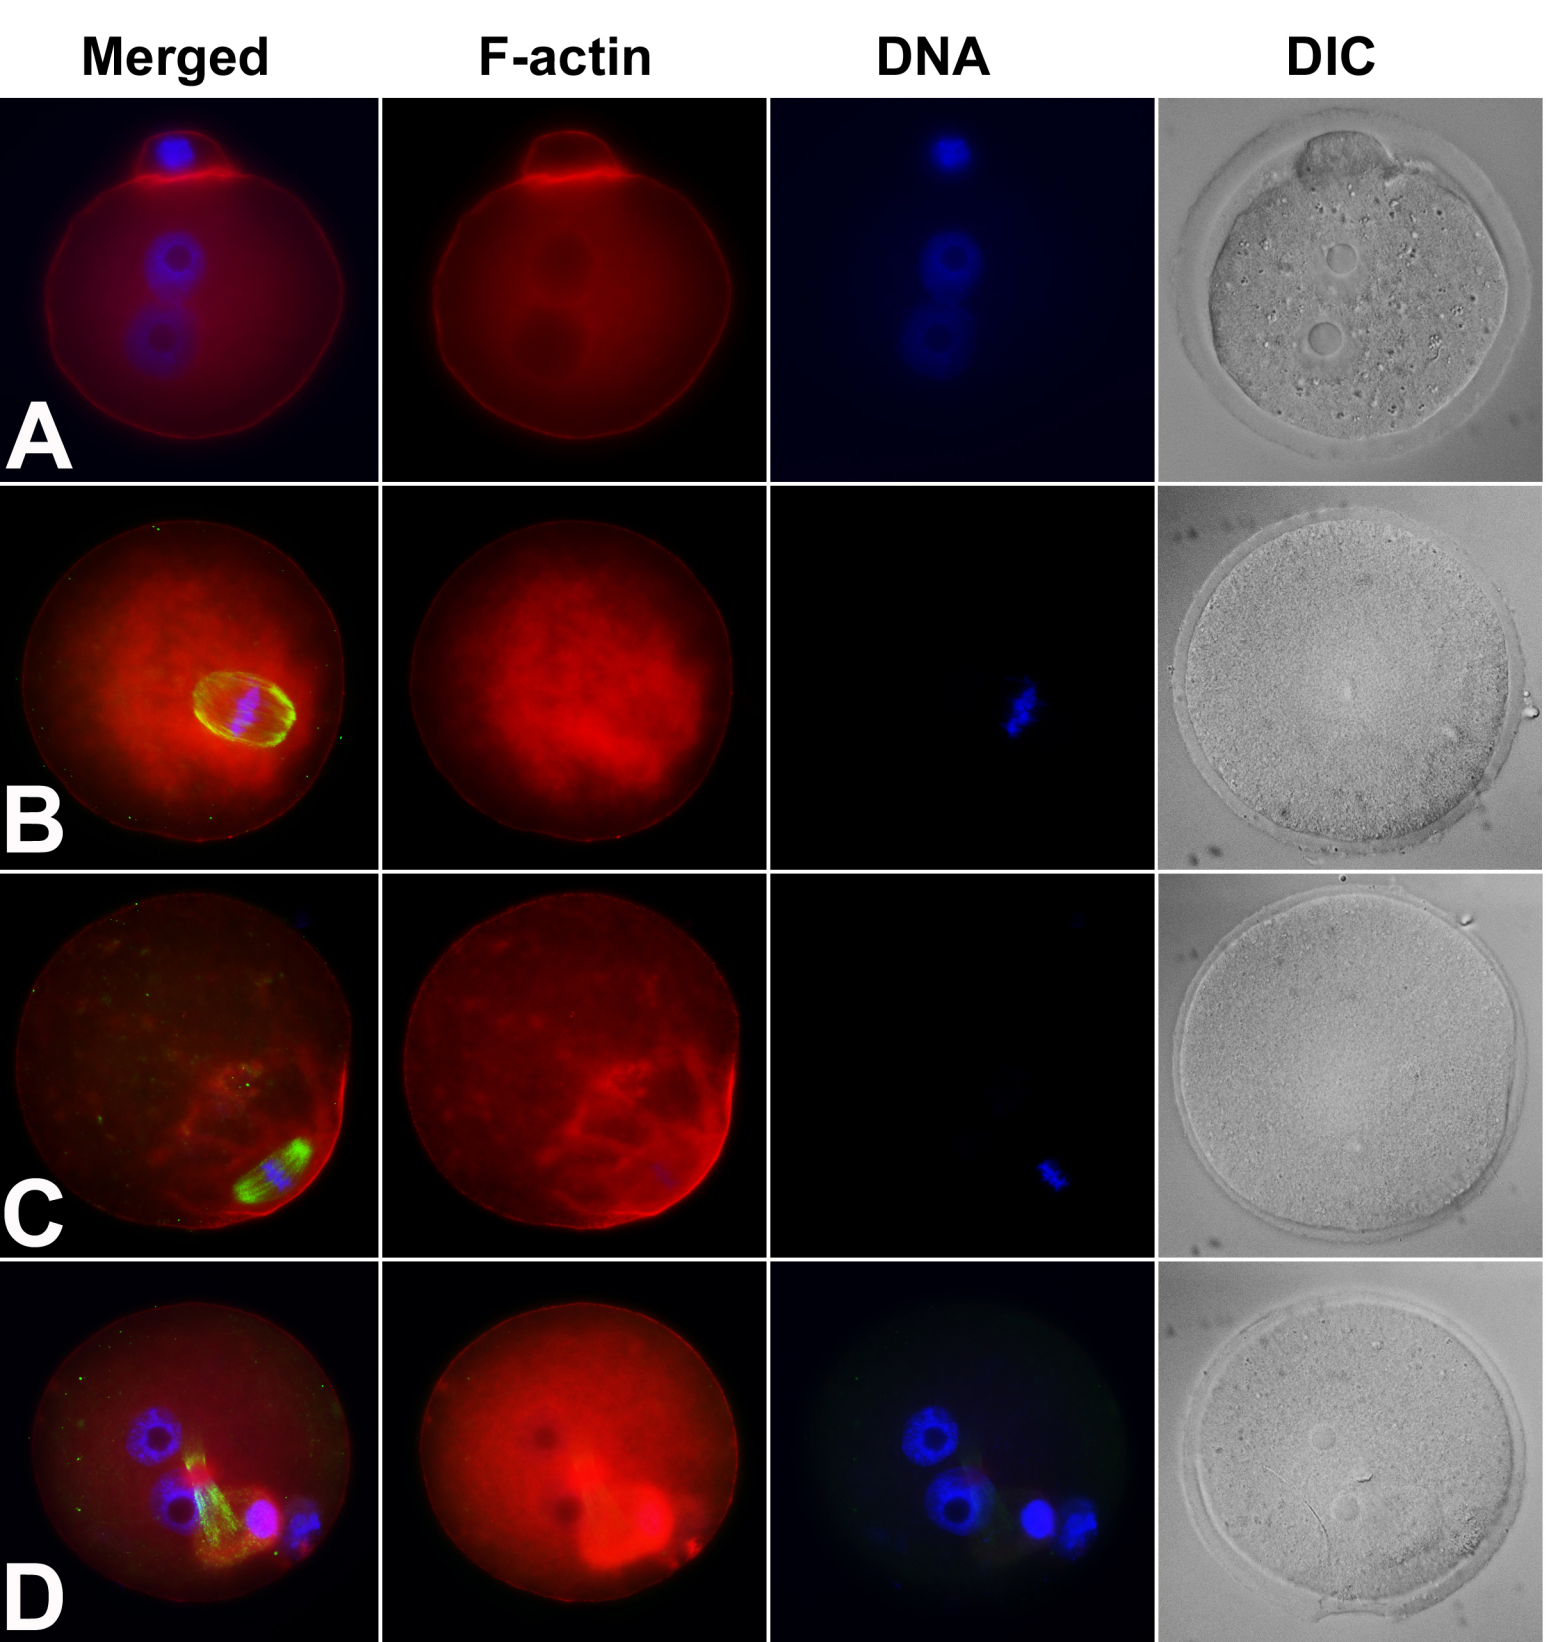

Suppl. Fig. 2.

Supplement: NIHMS658605-supplement-Supplemental_Figure_2.pdf [file NIHMS658605-supplement-Supplemental_Figure_2.pdf]

ICSI of UBAL-injected Ova (% 2PN)

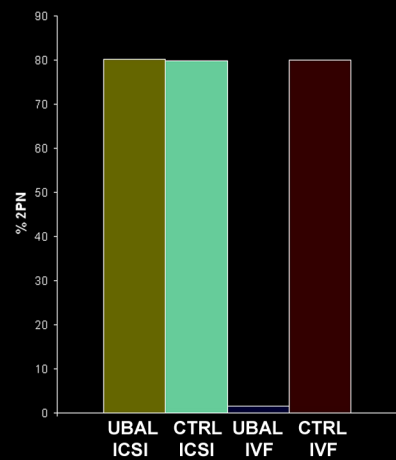

**A**

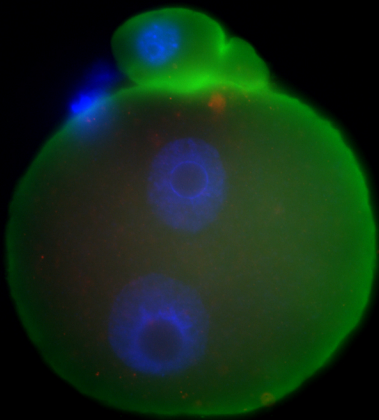

**B**

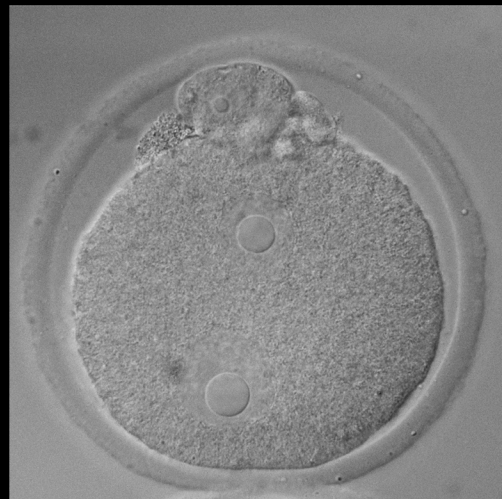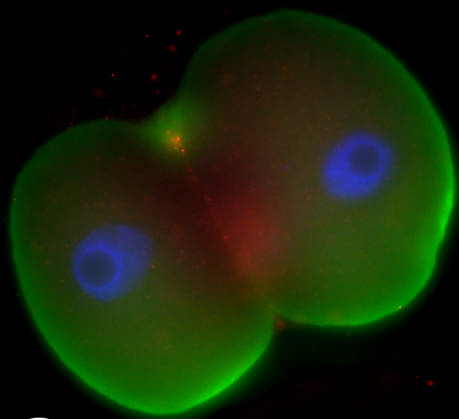

**C**

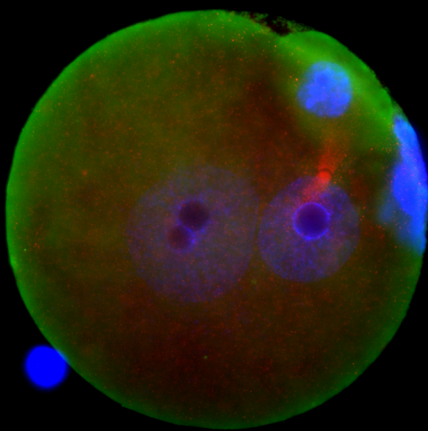

**D**

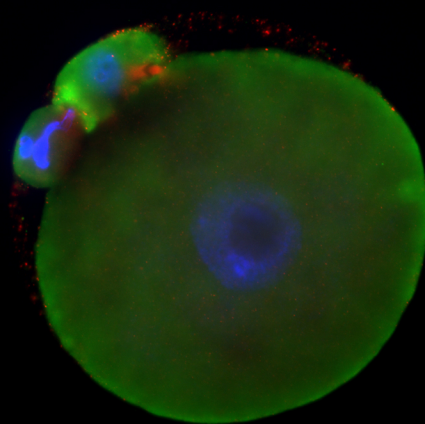

**E**

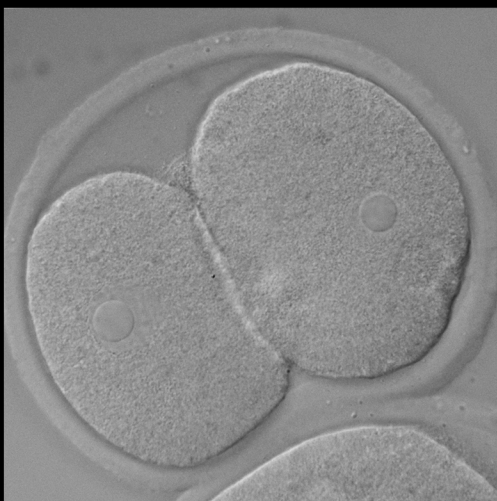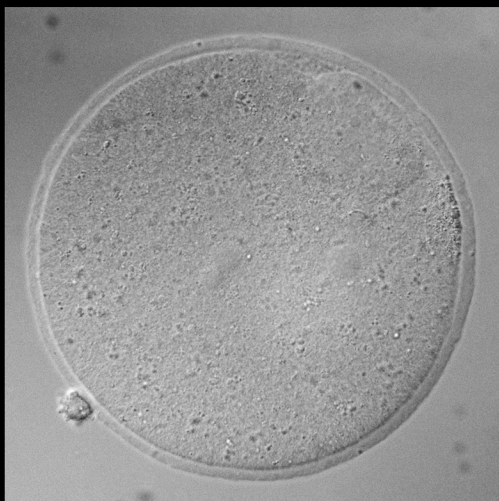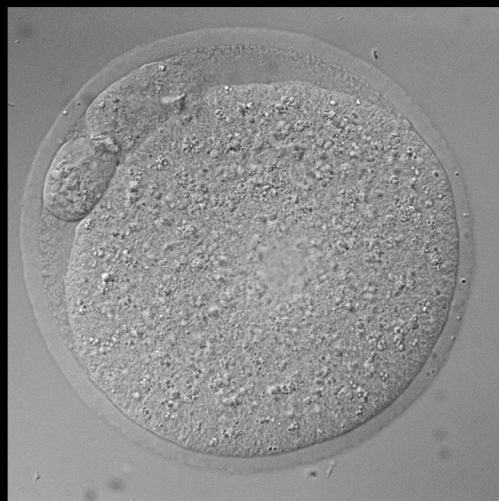

**Suppl. Fig. 3**

Supplement: NIHMS658605-supplement-Supplemental_Figure_3.pdf [file NIHMS658605-supplement-Supplemental_Figure_3.pdf]

A

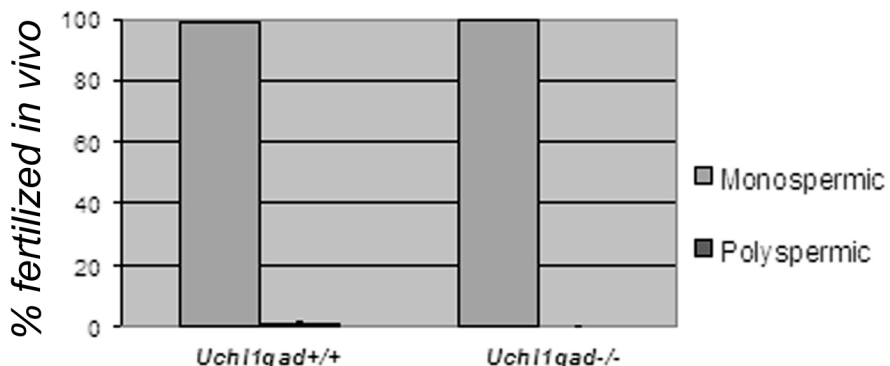

n of one cell zygotes: 76

*Uchl1gad*<sup>-/-</sup>

62

n of females: 9

8

B

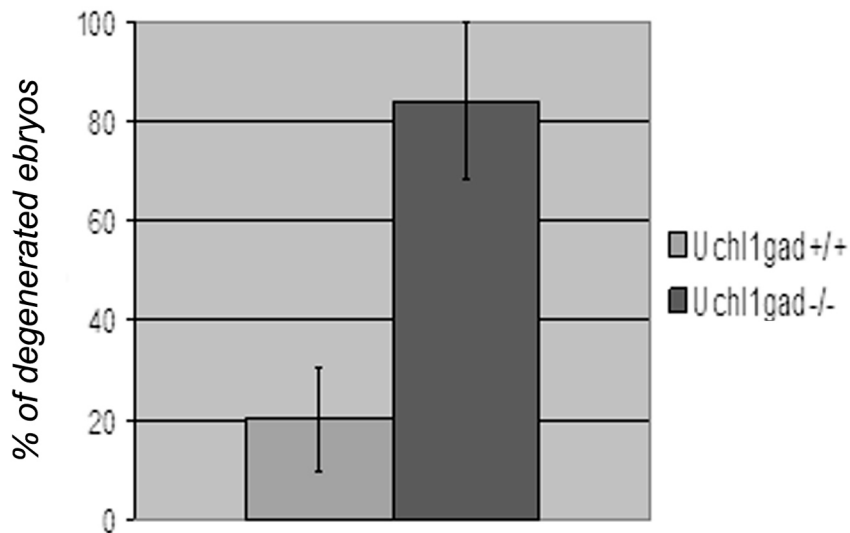

n - day 4.5 embryos

30

37

n - females

5

4

Supplement: NIHMS658605-supplement-Supplemental_Figure_4.pdf [file NIHMS658605-supplement-Supplemental_Figure_4.pdf]
